# Supplementary material for: Structure of the cohesin loader Scc2
Source: PubMed Central journal article supplement (PMC5227109; doi:10.1038/ncomms13952), 2017-01-06
Supplement: ncomms13952-s1.pdf [file ncomms13952-s1.pdf]

**SUPPLEMENTARY TABLE 1. X-ray data collection and refinement statistics.**

|                                                     | Native 2                          | Native 1                  | Gold                       | Selenium                   |
|-----------------------------------------------------|-----------------------------------|---------------------------|----------------------------|----------------------------|
| <b>Data collection</b>                              |                                   |                           |                            |                            |
| Space group                                         | P2 <sub>1</sub>                   | P2 <sub>1</sub>           | P2 <sub>1</sub>            | P2 <sub>1</sub>            |
| Cell dimensions                                     |                                   |                           |                            |                            |
| a, b, c (Å)                                         | 98.05, 106.4, 143.18              | 100.17, 108.62, 148.46    | 100.13, 108.47, 148.17     | 100.08, 107.90, 147.77     |
| α, β, γ (°)                                         | 90, 104.4, 90                     | 90, 106.72, 90            | 90, 106.56, 90             | 90, 106.42, 90             |
| Resolution (Å)                                      | 48.81 - 2.85 (2.952 - 2.85)*      | 142.18 - 3.3 (3.42 - 3.3) | 142.4 - 3.42 (3.56 - 3.42) | 107.9 - 3.50 (3.66 - 3.50) |
| <i>R</i> <sub>merge</sub>                           | 0.07152 (1.244)                   | 0.161 (2.062)             | 0.174 (2.410)              | 0.131 (1.927)              |
| <i>I</i> / <i>σI</i>                                | 10.36 (0.75)                      | 8.2 (1.0)                 | 8.2 (0.9)                  | 7.6 (1.0)                  |
| Completeness (%)                                    | 0.99 (0.96)                       | 100 (100)                 | 100 (100)                  | 99.6 (100)                 |
| Redundancy                                          | 3.3 (2.9)                         | 6.8 (7.0)                 | 6.9 (6.8)                  | 6.9 (7.0)                  |
| <b>Refinement</b>                                   |                                   |                           |                            |                            |
| Resolution (Å)                                      | 2.85 (2.8907 – 2.8500)            |                           |                            |                            |
| No. reflections                                     | 65853 (2429)                      |                           |                            |                            |
| <i>R</i> <sub>work</sub> / <i>R</i> <sub>free</sub> | 0.2239 (0.3715) / 0.2678 (0.4019) |                           |                            |                            |
| No. atoms                                           |                                   |                           |                            |                            |
| Protein                                             | 16017                             |                           |                            |                            |
| Ligand / Ion                                        | 0                                 |                           |                            |                            |
| Water                                               | 0                                 |                           |                            |                            |
| <i>B</i> -factors                                   |                                   |                           |                            |                            |
| Protein                                             | 96.43                             |                           |                            |                            |
| R.m.s. deviations                                   |                                   |                           |                            |                            |
| Bond lengths (Å)                                    | 0.013                             |                           |                            |                            |
| Bond angles (°)                                     | 1.74                              |                           |                            |                            |

\*Highest resolution shell is shown in parenthesis.

**SUPPLEMENTARY TABLE 2. Yeast strains employed in this study.**

All strains were in a W303 background.

**Y4820** *MATa pADH1-OsTIR1-myc9::ADE2, URA3::pMET3-scc2-IAA17::kanR, SCC1-HA3::LEU2*

**Y4818** *MATa pADH1-OsTIR1-myc9::ADE2, URA3::pMET3-scc2-IAA17::kanR, SCC1-HA3::LEU2, HIS3::pSCC2-SCC2-Pk3*

**Y4906** *MATa pADH1-OsTIR1-myc9::ADE2, URA3::pMET3-scc2-IAA17::kanR, SCC1-HA3::LEU2, HIS3::pSCC2-SCC2(D749A/S751A)-Pk3*

**Y4907** *MATa pADH1-OsTIR1-myc9::ADE2, URA3::pMET3-scc2-IAA17::kanR, SCC1-HA3::LEU2, HIS3::pSCC2-SCC2(K788A/R792A)-Pk3*

**Y4908** *MATa pADH1-OsTIR1-myc9::ADE2, URA3::pMET3-scc2-IAA17::kanR, SCC1-HA3::LEU2, HIS3::pSCC2-SCC2(E821G/E822S/D823A)-Pk3*

**Y4909** *MATa pADH1-OsTIR1-myc9::ADE2, URA3::pMET3-scc2-IAA17::kanR, SCC1-HA3::LEU2, HIS3::pSCC2-SCC2(Y1279A/E1280S/T1281G)-Pk3*

**Y4910** *MATa pADH1-OsTIR1-myc9::ADE2, URA3::pMET3-scc2-IAA17::kanR, SCC1-HA3::LEU2, HIS3::pSCC2-SCC2(K1454S/L1456A/K1459S)-Pk3*

**Y4911** *MATa pADH1-OsTIR1-myc9::ADE2, URA3::pMET3-scc2-IAA17::kanR, SCC1-HA3::LEU2, HIS3::pSCC2-SCC2(K1329A, K1332A)-Pk3*

**Y5196** *MATa pADH1-OsTIR1-myc9::ADE2, URA3::pMET3-scc2-IAA17::kanR, SCC1-HA3::LEU2, HIS3::pSCC2-SCC2(R1115A, K1119A, K1123S)-Pk3*

**SUPPLEMENTARY TABLE 3. Primers for real-time PCR.**

|         |                      |
|---------|----------------------|
| POA1-F  | AAACGGCCACATCAAATACC |
| POA1-R  | TCCAAGGGACTCCGAATATG |
| MET10-F | ACTTGTGTGGCCCTACTTGG |
| MET10-R | CGACTTTGATGCCTCTTTCC |
| CEN3-F  | CGCCACTTTAACAATGTGC  |
| CEN3-R  | GCAGAACCACCGTAGCAGTT |
| TUB2-F  | TTACCGTTGCAGCCTTCTTT |
| TUB2-R  | TGAGGAGCGACAGAACACAC |

a

```

Symplekin      MTTSERVVDLLNQAALITNDSKITVVKQVQELIINK-DPTLLDNFLDEIIAFQADKSIEV 88
GD0            -----SLNRVALGS--QHLKTLERLMQYIGADESSAEFGDF-----EY--WITL 202
                **:.** : .:..*::: : * . . : : * : * :
Symplekin      RKFVIGFIEEACKRDIELLLKLIANLNMLLRDENVNVVKKAILTMTQLYKVALQWMVKS 148
GD0            EDRATHILSEQCIDKLHIVFRNILSIPAVWTELDVSL----- 239
                .. . :.* * .:..: : * : : : : * :
Symplekin      ISELQEACWDMV-----SAMAGDILLLSDNDGIRTHAIKFV 186
GD0            LQRIMDVCVSTITICLEKIELKEYSHDYTLIAFGSSMVVFFIFLLDQNDRLQLQYMMV 299
                :.. :.* . : * : . : * : * : * : * :
Symplekin      EGLIVTSPRMADSEIPRQEH-DISLDRIPRDHPYIQYNVLWEEGKAALQL--LKFMV 244
GD0            PLQFLTFTADNLEEEFDRGGNGVERSLA---MLHSTLDVFYMYISNPKLDDGLVVKLVY 356
                :*:: :.* * : : ** * : : : . * * : : * :
Symplekin      HISSINLTALGSLANIARQ 264
GD0            MFTELIMSTWSHNVSVSLO 382
                :.. :.* .:..: : *

```

b

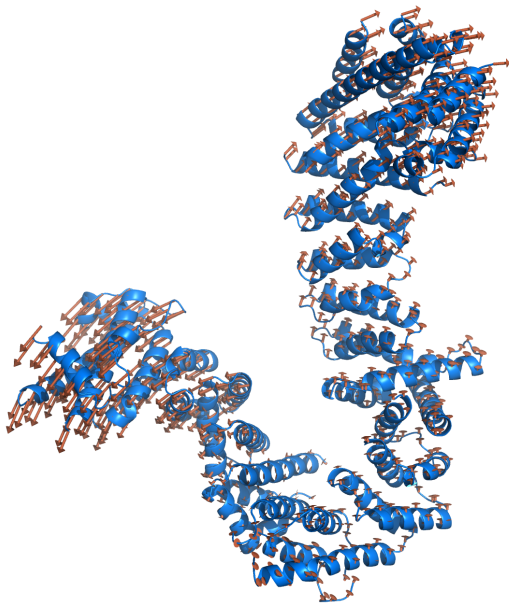

c

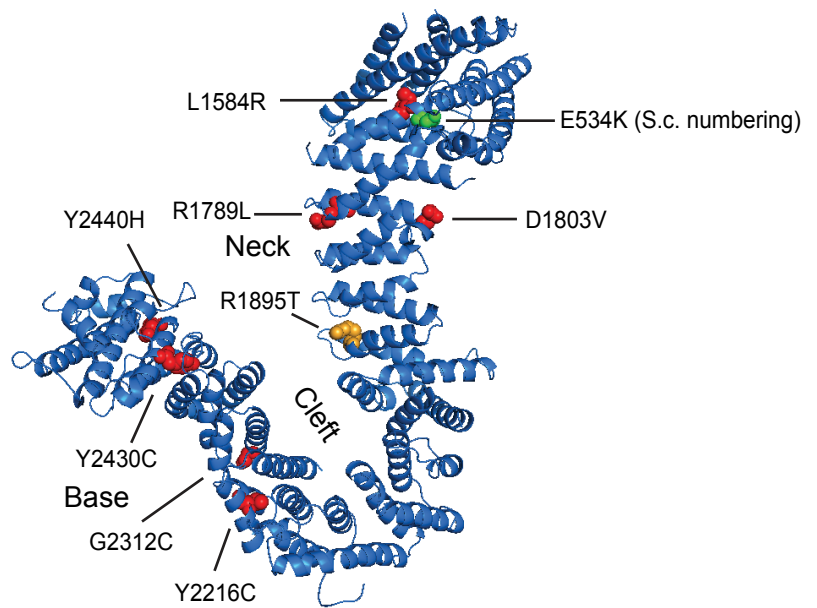

### Supplementary Figure 1. GD0 alignment and CdLS mutations

(a) Sequence alignment between GD0 and human symplekin.

(b) Normal mode analyses (NMA) of Scc2 hook structure with arrows indicating major predicted normal mode motion.

(c) Scc2 hook structure with a yeast ts mutation (*S. cerevisiae* E534K, green) and the equivalent human CdLS mutations (red and gold) indicated. Gold mutation is responsible for the recruitment of HDAC3. The buried nature and changes in chemical properties of the CdLS mutations suggest that structural integrity of the human Nip1Scc2 would be compromised.



```

AgSec2      -----LEEEFDRGGNGVERSAMLHSTLDVDFMYISNKPPLDDGLVVK--LVYMFTEELIM 363
ScSec2      -----LKILTIYEG-SLKIEFDTFQEALELLPKYIRNGPFLDDNVTAK--LVYIFSDLLM 372
SpSec2      IVQSKTSDARTSEIQHLSVLLQKVANVLNLSKVAHEIP-LSEAVVIR--IVYLFPKVST 430
CtSec2      RNTSDTEELFKALSSCKRRILPLMTDAQKLLSMMSELIAKVDTSSETVTNALEFAASQLLF 617
HsNipbl     -----GGLSSKAKRACSTHKQRVIVMLYNKVCDIVSSLELLEIQ---LLTDTTIL 1417
      :
      :
AgSec2      STWHSNVSSVSLQN-HIGNVKTIGMKSIEVLFPEKLPEQLFIIDELLSHLDNLPNTRSQK 422
ScSec2      NNDIEATTNIQFQS-FWDNVKRISDILVSLFGSFDQQRGFIIEELLSHIEKLPTRKIQK 431
SpSec2      LDNSFKTKLPNCNSSSDFDLKAPLQTLQYLFRLYPYQRDFIIEESLTFNFSHLPARTSVS 490
CtSec2      IETANAERDSVIETQKFDGFRVLVAMDMICQIFLLNPSQRQGIIDEILTSLEKPLGKRAR 677
HsNipbl     QVSMGITPPFFVEN--VSELQLCAIKLVTAVFSRYEKHRQLILEEIFTSLARLPTSKRSL 1475
      :
      :
AgSec2      RMKNIG-----KNLHITHSYIMLSILQVWNNYDYCSNLVSPDT----- 416
ScSec2      LKRVGN-----QNIYITDFTFLMSLENINCYFCNQMKDIAP----- 471
SpSec2      RYRSL-----NGSKIYYSTLFRVLIQSCSIQNLDFSEIVQSESKS----- 532
CtSec2      TFKLAD-----GSSIQPVSAIMRLVQTSAGKDEGRGSSGRLDMTGEGVQKVTGAKAFI 730
HsNipbl     RNFRNLSSDMDGEPMYIQMVTALVQLIQCVVHLPSEKDSNAEED----- 1521
      :
      :
AgSec2      -----EQLHDLIAHHAATQSDLEFAADHIDTILKCKFSNI----SKYRFVF 504
ScSec2      -----ENIDLLKNEYKQEEFLFNIIVEHINDTILERFFKNP----SALRYVI 514
SpSec2      --TEALHSGNLTEHLKTVESILSKSRHEEYRIANHIVAYLLSRSLKQNKTESDNSFAILT 590
CtSec2      IQSEAQASQSHSTAIRDLDTISTPLLETARNNASYVVKFIVNRALNSTKS-GDTPYRNL 789
HsNipbl     -----SNKKIDQDVVITNSYETAMRTAQNFLSIFLKKCGSKQGE---EDYRPLF 1567
      :
      :
AgSec2      DQFVTDMTTVPVLPDWPVSLRLARLLKLLSIFNPQSQKHIN-----IESVALQGIG 557
ScSec2      DNFDQLLLLISSPQWPVEKLLSLLKRLLSVSPSQVANSAN-----IETICLQLIG 567
SpSec2      KILLEDLLNMLSPWCGETTIRQFAMNLVMTVNDKQAVSSKNAALDILSIVNKVLA 650
CtSec2      DLFVEDFITCLDNDPWAPELRLRLMLMVLGVENDKSSIMAKNMALELLGTMAAISK 849
HsNipbl     ENFVQDLSTVNKPEWPAEELLSLLGRLLVHQFSNKSTEMALRVASLDYLGTVAAARLRK 1627
      :
      :
AgSec2      ScE534K ts mutation L1584R25
      LIGSTILDIRLSS-----NSNPANLIHLFNYPEDIDG--LFKA-YRTCLAYC 602
ScSec2      NIGSTIFDIKST-----RDHEDNLIKMINYPETLPH--FFKS-FEECIAYN 612
SpSec2      LFDLSLFEKHNIP-----APTNFNDIISFIPSIIRLNE--LSQVSNHNFYFLC 696
CtSec2      LRGVVRKMASALE-----ADELSLFLSDLAASALELKS--RPEHMVAWTPGYPYR 895
HsNipbl     DAVTSKMDQGSIERILKQVSGGEDEIQQLQKALLDYLDENTETDPSLVFSRKFYIAQWFR 1687
      :
      :
AgSec2      TNSVQHHTPYKFLWCKQLD-----VLTCLKEMDKESQGWGSKLQKQFLSLIE 649
ScSec2      ETIKCRRSATRFLWNLRLG-----TILILEEYTKDAKEQIITVDNELKILE 659
SpSec2      KGLSLENILPYNYNKWF-----FLLQLRKCVCNDS-EALKIIDNCIDKNMQ 742
CtSec2      ATLEYLQSRSRFNEDAQLSSAMTFIISEWGSKICTCYDGYQDDVLERDQELGRLAYLRE 955
HsNipbl     DTTLETEKAMKSQKDEESSEG-----THHAKEIETGQIMHRAENRKKFLRSII 1736
      :
      :
AgSec2      SIH----LPLEQA-ANLGAVEILPTYCSTLLTSELINMYEPYKLVLSLLERHKVKL18SG 704
ScSec2      QIKDGGGLPELEN-READFSTIKLDYFSLHAFELLNLYDPYKLLSLLAKDKIKL18ST 718
SpSec2      KSQEGFGQSPFK-ADENDEDI---FIIISLHSSFLNLKFFVSLIIGFLDPSQASL18TK 798
CtSec2      MILDRKWLSTEYTYKDVSPLOAKLSYSIILLRSQFCEAFGAILNILLNSMASDQPTV18SK 1015
HsNipbl     KTTSPQFSTLKMNSDTPVDYDDACLIVRYLASMRFPAQSFDIYLTQILRVLGENAIAV18TK 1796
      :
      :
AgSec2      AIRCLALLISK18KNMLY-TPIVKETIENRLTDSPLVKDAILELI----ELGSSYIDFY 758
ScSec2      AIKCLSMASK18KVILS-NPMVKETIHRRLNDSSASVKDAILDV----SINSSYFEFY 772
SpSec2      CLRIINQMKT18PSILRT-HPEVLAQIISKNSDQSAIVRDTVLDLLGTYIMAYRETIQIY 857
CtSec2      SLKINQVMEAD18PTILDGDVVVQILIRSSSDSSTQVRDSALGLISKICISLRPALEEKMT 1075
HsNipbl     AMKCLSEVVAV18PSILA-RLDMQRGVHGRMLMDNSTSVREAAVELLGRFVLCRPQLAEQY 1855
      :
      :
AgSec2      QHININYNDSSMLVRKHVLRMNQIIYDDTEDI18IKAYVASRILR18IEDEEDVIETARSE 818
ScSec2      QQINNNYNDSSIMVRKHVLRINEKMYDETNDIVTKVYVIARILM18IEDEEDNIIDMARLI 832
SpSec2      GCIIISGIDSPSTIVRRAIKQLCEVYEATEDLNIRVDIASKLL18RSDNEEETISELSLEV 917
CtSec2      ETVVNRFSDAQPGVRRKRAMKAKDIYLRNSNRVLRSAIANGLLH18RVDPEESVRDLARQV 1135
HsNipbl     DMLIERILDGTISVRKRVIKILRDCIEQPTFPKITEMCVKMIR18VND-EEGIKLVNET 1914
      :
      :
AgSec2      LLKRWILSIQCPNAKPE-----LQIKNCRVSRIVIAQLLVGGDKICDLFEHFLIFYVLNK 873
ScSec2      LLNRWILKVHEVLDQPE-----KLKEISSVLLVMSRVAIMNEKCSQLFDLFLNIFYLLNK 877
SpSec2      LEKISYSPASNELDCQKGYEQLTFLKQKLRVQYFPIKLCAPSTERHVLVLSLTKTML 977
CtSec2      IEEIWFAPFHSGETSAA-----SQISLSEHVILMVQTVKRGVNVANVLDKVLQALL 1185
HsNipbl     FOKLWFPTPHNDKEAM-----TRKILNITDVVAACRDTGYDWFELQNLKSE 1964
      :
      :
AgSec2      NAHTEDQNKLISSSLCLLTDQVIEMVIENEAADVDNQR-EEEGRNIMKFLSVLSSCQDSF 932
ScSec2      EAHSKEAYDKITHVLTILTDFLVQKIVELNSDDTNEKNSIVDKQNFLLAKFADSTVSF 947
SpSec2      TSKEEINLSTLHTQIRLLLSCLFNQLIEVVTEDQVDESTKILYEIMSTLFFVSRAPFL 1037
CtSec2      SPSKTSQASMEVCRKLVG-----SMPDLIDNIDSNDASAPSGRDVQLVLMIFAKAEASL 1240
HsNipbl     EDSSYKPVKACTQLVDNLVHEHILKYEESLADSDNKGVNSGRVLACITTLFLFKIRPQL 2024
      :
      :
AgSec2      ITKDHITALYPYLHSD---TKSDFQLHILKVRNTEQLSHFKPKFLYDLETTLSRLPR 989
ScSec2      LTKDHITALYPYVMSD---EKSDPHYIYLVFRCTFEKLANFKQKFLYDLETTLSRLPR 1004
SpSec2      FDLSYLHLLKPYLRSASTIEEQRFLYVVAIFRQVLPFQKEISESFLRSLESVLLQRLTK 1097
CtSec2      FTFFQLRLLRPYIASIGTSEDLTVSRVVVIVRRVLPQLSAAHQFLTDRKELLPVVAK 1300
HsNipbl     MVKHAMTMQPYLTTCSTQNDFMVICNVAKILELVPLMEHPSETFLATIEEDLMKLIK 2084
      :
      :

```

```

AgScc2      MNVRELDEAIPLSWSLSRHRKDDTRICKACASCLGQLSPYIANATD---PSAVRDPGKL 1046
ScScc2      MNVREIDEAMPLIWSVATHRHDTARVAKACSSCLSHLHPYINKANNE---EAAIVVDGKL 1061
SpScc2      AGTATLMEIVPCLCSLFTRLNDYERLKKIVVSCLSLEEARHSENNF---QKMVR---L 1150
CtScc2      VPRALLDDVMACLWIIISTLLGTYEPLARLVISSLKGIQKTRASAQVQLDQLKIRQFDY 1360
HsNipbl     YGMTVVQHCVSCLGAVVNKVTQNFKFWACFNRYYGAI SKLSQHQE--DPNNTSLLTNK 2142
      . . . . .

AgScc2      QRLLYLATGFARFCFSF-ENTEGKFPNLKTRENI FEYVTKCLLMFTKENIHHVIRRIATKN 1105
ScScc2      QRLIYLSTGFARFCFFP-KPSNDKIAFLQEGETLYEHI TKCLLVLSKDKITHVIRRVAVKN 1120
SpScc2      IDLIGLFSRYGDLNRINDDKHSLDFISPECDDAYVILLGYFQKLLKDAKQLRHIIDN 1210
CtScc2      SLIVGMAGKHCNLDSHHEMFKEHFKFS--GASVSKLMVDIVVFAAPSWPLDVRKPALDC 1419
HsNipbl     PALLRSLFTVGALCRHFDLDFLEDFKGN--KVNIKDKVLELLMYFTKHSDEEVQTKAIG 2200
      :: . . . . .

AgScc2      LVKIASRYPKLFNSRHVLTVDTQFEKGI--LDIQLVLESYDFFLAEE----RRSLI 1158
ScScc2      LTKLCGNHPKLFNSRHVHLHLDKEFQSDQ--LDIKLVILESLEYDLFLLEE----RKSVR 1173
SpScc2      MSRICLRETSLFI SPLMLSTLDMIIAENN--VNEVSVLFKSFLELLAADEDLIFEADQKL 1268
CtScc2      VGLVCQSSPRNYVAANVYTAQQVFDQI--PILETMVLRSLKFEFLFSEE-----KRS 1470
HsNipbl     LGFAFIQHPSLMFEQEVKNLNNILSDKNSSVNLKIQVLKNLQTYLQED----- 2250
      : . . . . .
      V2216G21

AgScc2      QVGVDGTISSNNELRKVVANHTKSDSINDGIC SALVSRYLDKILKICLIADLNNAVIAIR 1218
ScScc2      NTGVNSTLSSNISLKKLLKTNRVFANFANGVCSALATRFLDNILQLCLLRDLKNSLVAIR 1233
SpScc2      SLKQKQNVQSNKSVDRDMLKGTQKQWIEGVSASLMQHFLPCILDSCFSKNLRYSMGLIE 1328
CtScc2      EQEPEGPAGKGDGESSKKRELTVIGGTNYDDVASATHRFLKDI TRIATSTQDDHAFVAE 1530
HsNipbl     --TRMQQADRDKVKAQEDLKEMGDVSSGSSSIMQLYLKQVLEAFFHTQSSVRHFALN 2308
      : . . . . .

AgScc2      FLKQILTYTYTNPSCVPTVIALTASPNSYMRDLSSEMFSELQGYESMAFNCLNQGIRL 1278
ScScc2      LLKILKFTYTNPSHSIPTVIALFASTSQYIRHVAYELLEDFEKYETLVFSSLSRQVTK 1293
SpScc2      ILKCIHQGLVNPFCSTIIALESNAIKETREVALLLHTELHRRHESLIDGLYAQSADL 1388
CtScc2      VLASINRQGLVHPKETGVFTITLATSTHPRI SELAFLEHKALHTKHETVIEREYAKAIQS 1590
HsNipbl     VIALTLNQLIHPVQCVPLYIAMGTDPEPAMRNKADQQLVEIDKKYAGFIHMKAVAGMKM 2368
      . : * * * . * . . . .
      B2312C24

AgScc2      GTEYAVKIRPK-QFHEDSMFLRRLQQLMSTNKRNRKFKLVVKKTVFVSNYLSSTSVNYEES 1337
ScScc2      AIHYSIHTDEK-YYKHDHFLSLEKLCGTGKKNPKFKFVVKLR-IMQSYLDDITDLTST 1351
SpScc2      IFS-LQKTEEY-QTFKLGEFSPFQSAYTI VSADKSSKSRKKLIMQILKPLKLDGIDLPSF 1446
CtScc2      IFAYQRDI VKDPRGATTNFTPKLHLFMEVLKISKAKNRVKFLEKLVSQIDFDIAKL DMS 1650
HsNipbl     SYVQQAINTCLKDPVRGFRQDESSALCSHLYSMIRGNRQHRRRAFLISLLNLFDDTAKT 2428
      . . . . .

AgScc2      -----CYHII LLHNSKIS DNMLEYEMLRVISVSEYFSDRISERL-DGFQSN--- 1387
ScScc2      NSS--VQKSIF LCTNINISITVVSQYDLVSLKTDILTDRLKEVIMDEIGDNVSSL--- 1406
SpScc2      TEE--KVSFVS FCCVCLAGIPVSVIEEPLMISTVDSVLATIGPTITGWMKKL DHER--- 1501
CtScc2      EELPPHVQYSRI IENLAFFEYVTVGEIHSLVAAMERLVASTGASVAQVIESEVFHLRID 1710
HsNipbl     DVT-----MLL IADNLACFPQTQOEPLFIMHHIDITLSVSGSNLQSFKESMVKDKRK 2483
      :: . . . . .
      V2430C20 V2440H18

AgScc2      -----QNTAAEVSA 1396
ScScc2      -----SVSEEKLSG 1415
SpScc2      -----FKILAGINL 1510
CtScc2      VLDAPSSQSPNDGQLRAEAQTGGQVNP LLDPIE-----YSRLRQLTA 1753
HsNipbl     ERKSSPSKENESSDSEEVSRPRKSRKRVDS DSDSDSEDDINSVMKCLPENSAPLIEFAN 2543
      . . . . .

AgScc2      IIVTRLSIEFKRFMEQHHLSEAKLTL LLDATDDENLRNKSVAALDDQVGS LHMENIFLG 1456
ScScc2      IILIQLSLQDLGTYLLHLYGLRDDVL-LLDIVEESELKKNQLPAKKPDISKFSAQ---LE 1471
SpScc2      CNLIYLKRYIKYAFSISDSSRP IREKPLTLNRYGYVDLITSDAKPDI VSKLVIK--LFE 1568
CtScc2      ASMILLAIWEVRTYLRRLYSLGTNRR--ENS AKPAKPQVKDLARPPVKVQGTGDKVWEE 1811
HsNipbl     VSQGI LLLMLKQHLKNLCGFSKIQKYS PSES AKVYDKAINRKTG--VHFHPKQTLDF 2601
      * . . . .

AgScc2      YENPINNKDYCWKYISTLHRDEI----- 1479
ScScc2      NIEQYSSNGKLLTYFRKHVKDT----- 1493
SpScc2      EENILSGEDQVEGEQLTVV----- 1587
CtScc2      INNIMGALSGRERMVRACKDLVELMSI DKEFLVPSEEDMDLDAAGE--- 1944
HsNipbl     LRSDMANSKITEEVKRSIVKQYLD FPKLLMEHLDPDEEEEGEVSASTNARNK 2653
      .

```

**Supplementary Figure 2. Sequence alignment of Scc2 hook.**  
Temperature-sensitive (green) and Cornelia de Lange mutations (red and gold) are labelled. Ag – *A. gossypii*; Sc – *S. cerevisiae*; Sp – *S. pombe*; Ct – *C. thermophilum*; Hs – *H. sapiens*. The same alignment is used for Scc2 surface conservation analysis.

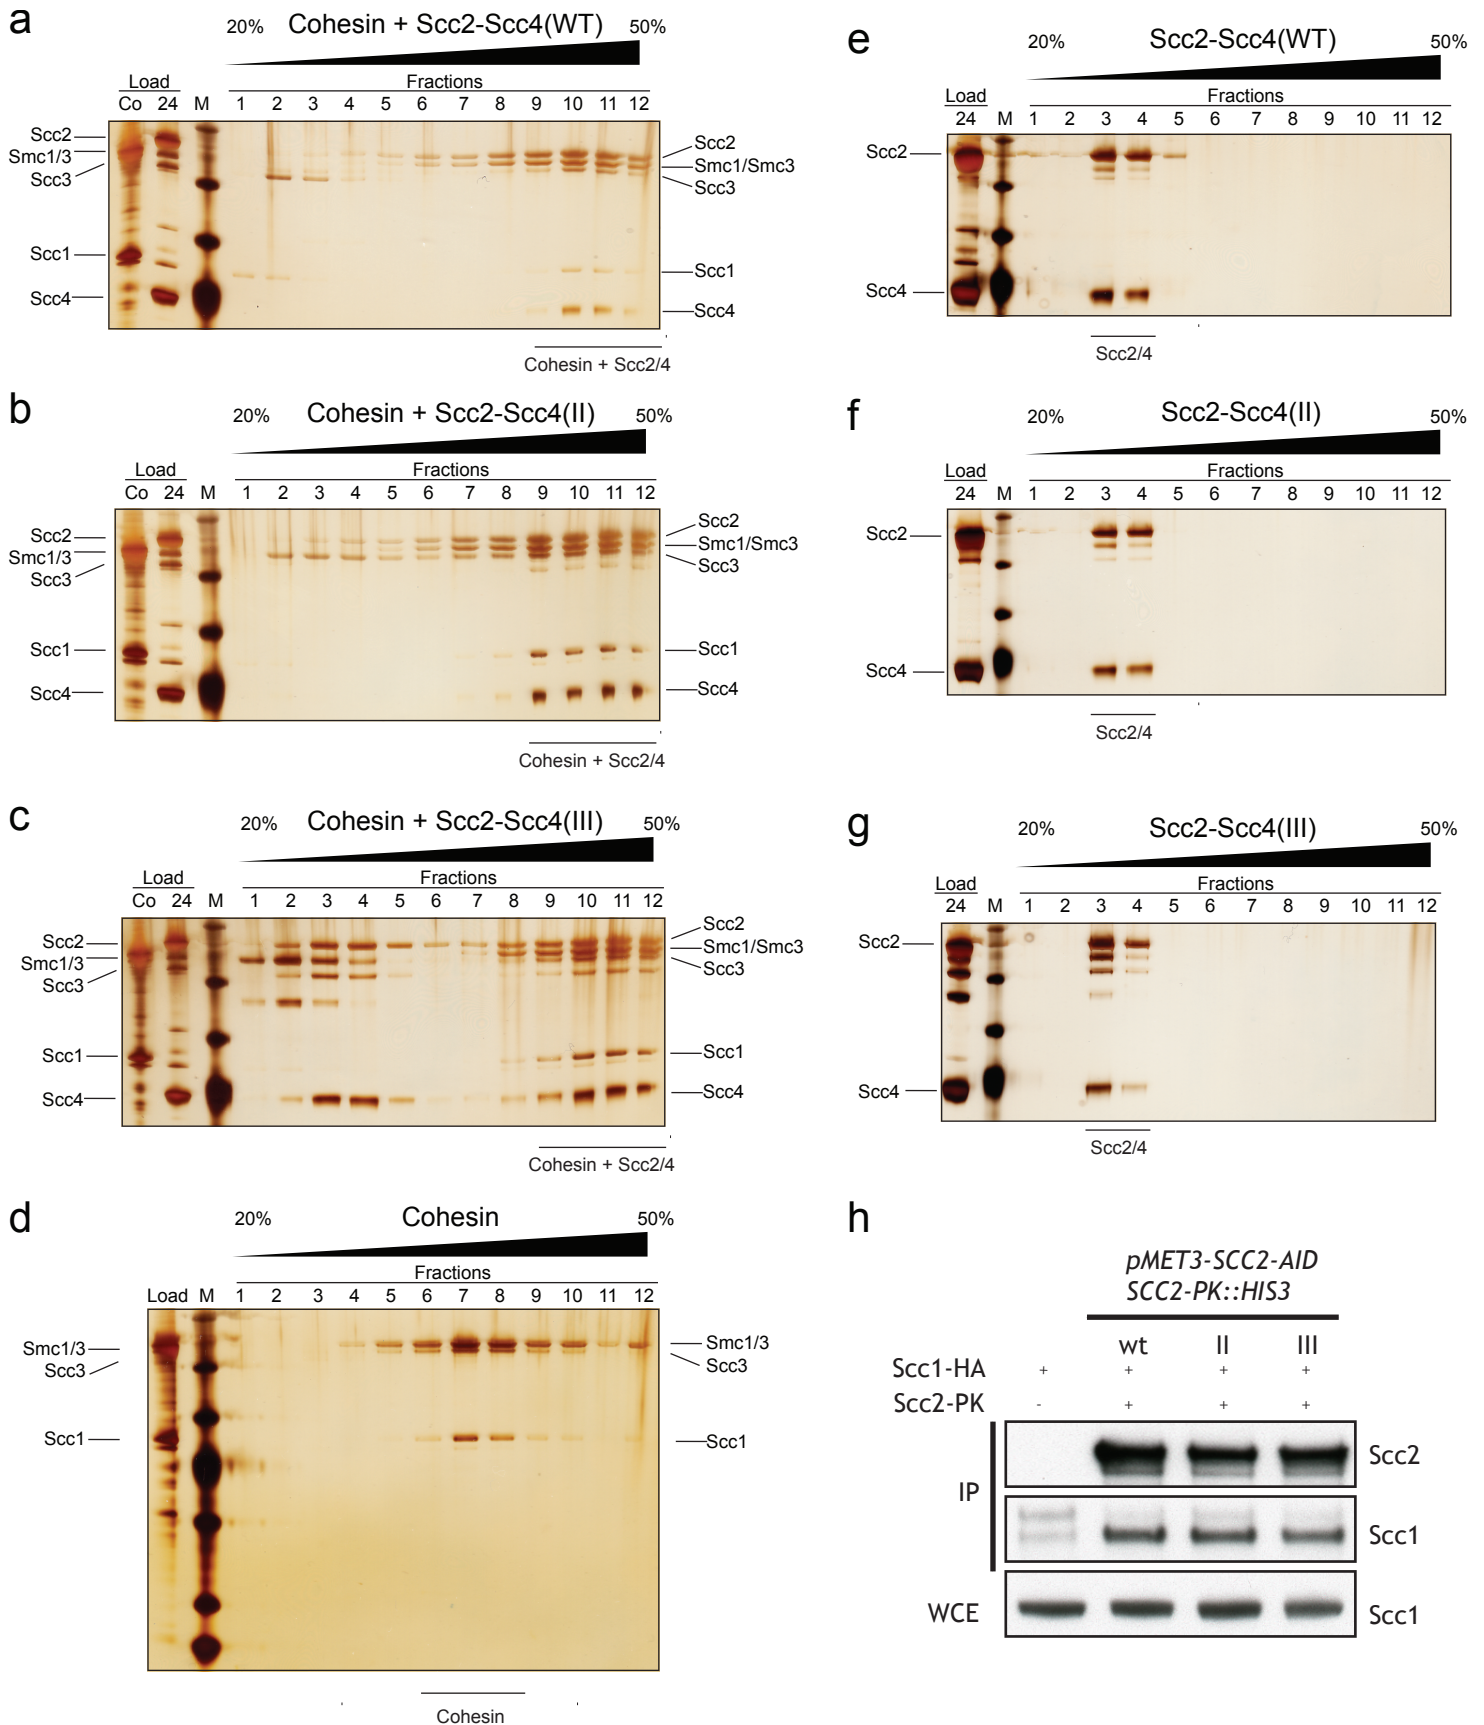

**Supplementary Figure 3. Scc2-Scc4 neck mutations do not affect cohesin binding.**

(a) Silver-stain gel showing glycerol gradient fractions of *S. cerevisiae* cohesin plus wild-type Scc2-Scc4.

(b) Silver-stain gel showing glycerol gradient fractions of *S. cerevisiae* cohesin plus Scc2 (K788A/R792A)-Scc4 (Group II mutant). Cohesin interacts normally with Group II Scc2-Scc4 mutant.

(c) Silver-stain gel showing glycerol gradient fractions of *S. cerevisiae* cohesin plus Scc2 (E821G/E822S/D823A)-Scc4 (Group III mutant). Cohesin interacts normally with Group III Scc2-Scc4 mutant.

(d) – (g) Silver-stain gel showing control glycerol gradient runs.

(h) Co-immunoprecipitation showing that Group II and Group III mutants interact with cohesin same as wild-type Scc2 in vivo.

a

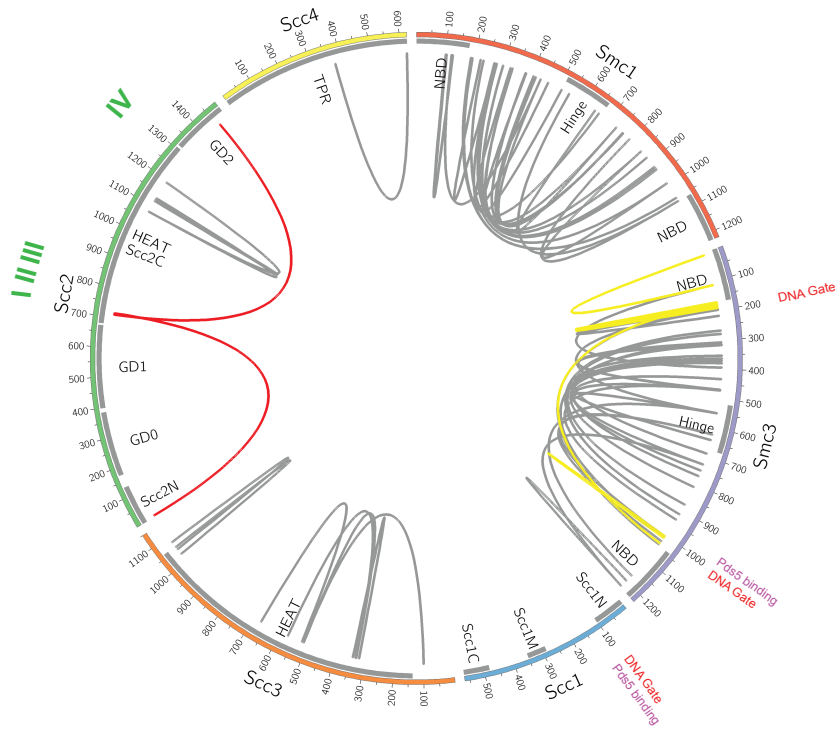

b

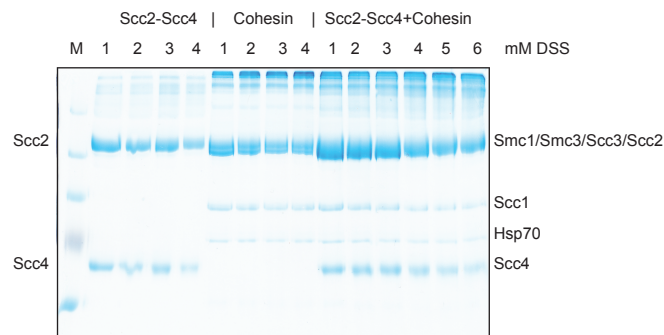

**Supplementary Figure 4. Crosslinking/mass spectrometry analysis**

(a) Diagram indicating intramolecular crosslinks (n = 108) within cohesin and loader subunits. Crosslinks that indicate the flexible conformations of Scc2-Scc4 seen under EM are in red. Crosslinks that are consistent with published Smc3-Scc1N and Scc2N-Scc4 crystal structures<sup>7,32</sup> are in yellow. All intramolecular crosslinks are further than 20 residues apart.

(b) An example of SDS-PAGE gel showing crosslinked samples between cohesin and Scc2-Scc4 used for mass spectrometry analysis. The reaction was incubated at 28 °C for 40 minutes and quenched by adding Tris 8.0 to a final concentration of 50 mM. Eight equal-sized bands were excised from each lane of the Scc2-Scc4 plus cohesin samples for trypsin digestion and mass spectrometry analysis.



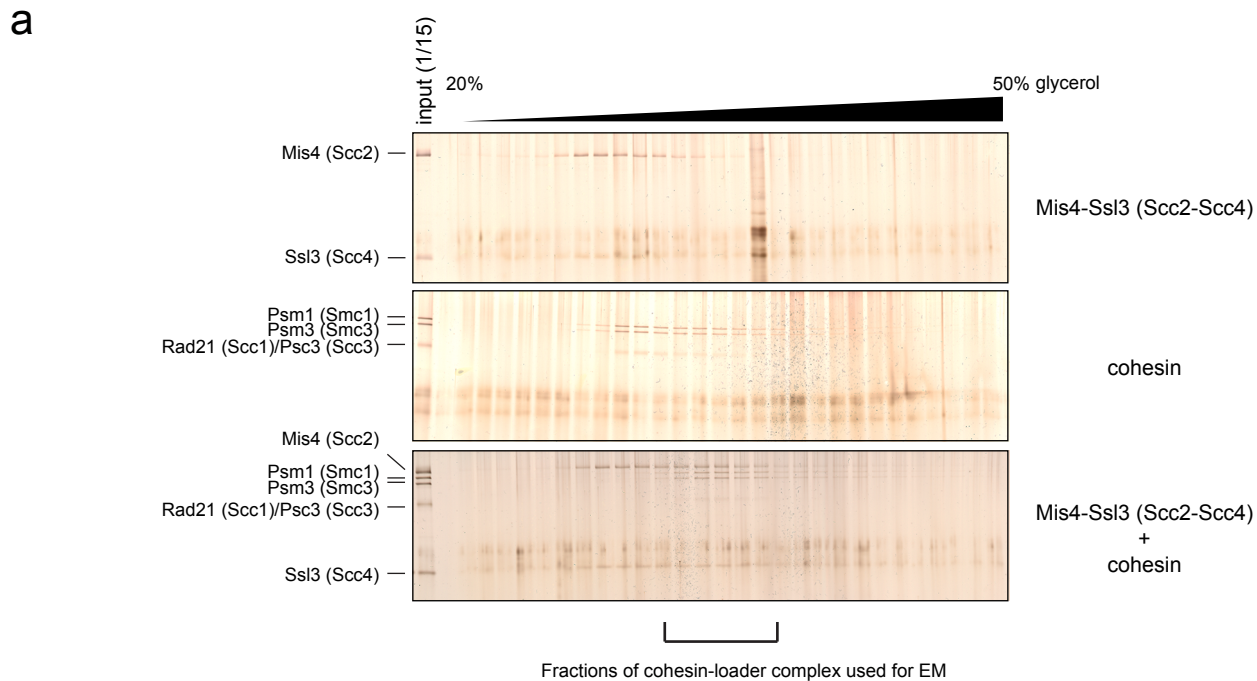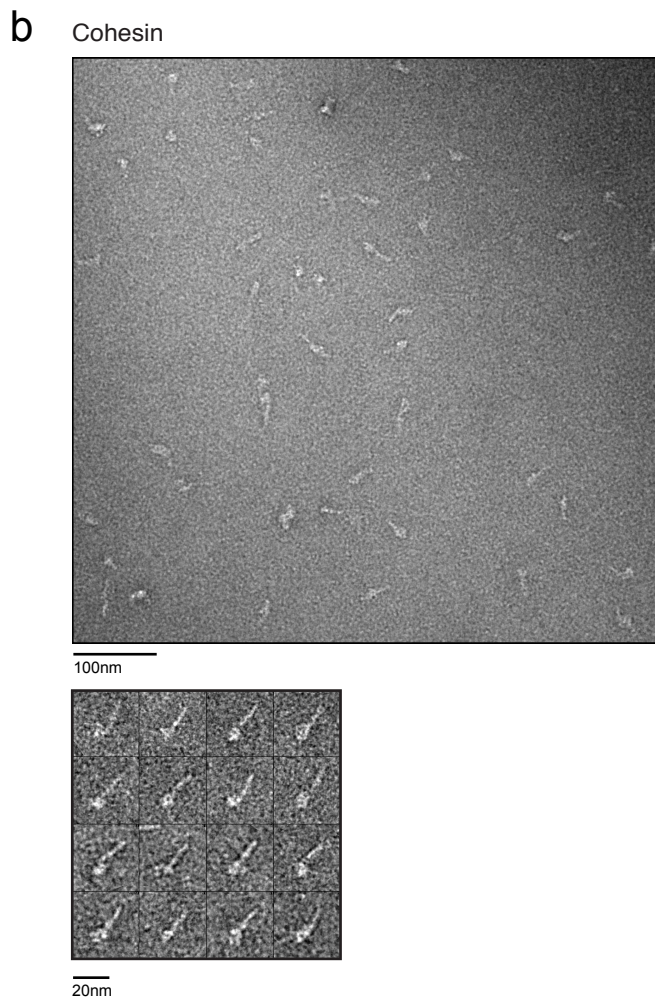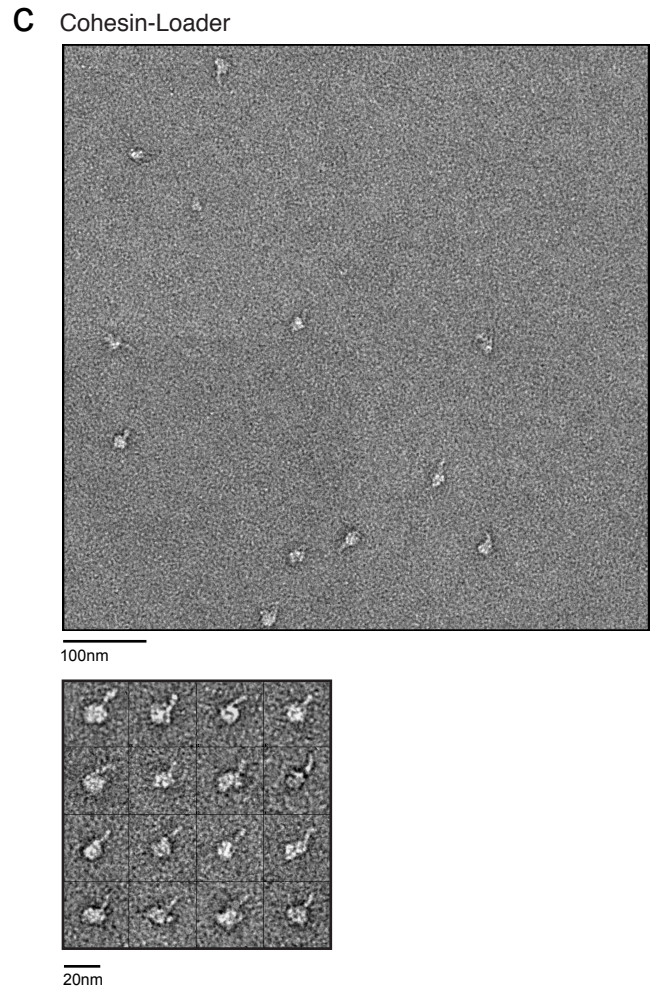

**Supplementary Figure 5. EM analysis of cohesin and cohesin-loader complex**

- (a) Silver staining of fractions from glycerol-gradient centrifugation showing the formation of the *S. pombe* cohesin-loader complex.
- (b) Top panel: representative micrographs of cohesin under negative-stain EM. Bottom panel: selected images of cohesin. The molecules have a “rod-shape” conformation with a head likely composed of the Smc ATPase head domains, Scc1, and Scc3, and an extended tail composed of Smc coiled coils.
- (c) Top panel: representative micrographs of cohesin-loader complex under negative-stain EM. Bottom panel: selected images of cohesin-loader complex. The molecules also have a “rod-shape” conformation with a head likely composed of the Smc ATPase head domains, Scc1, Scc3, Scc2-Scc4, and an extended tail composed of Smc coiled coils.

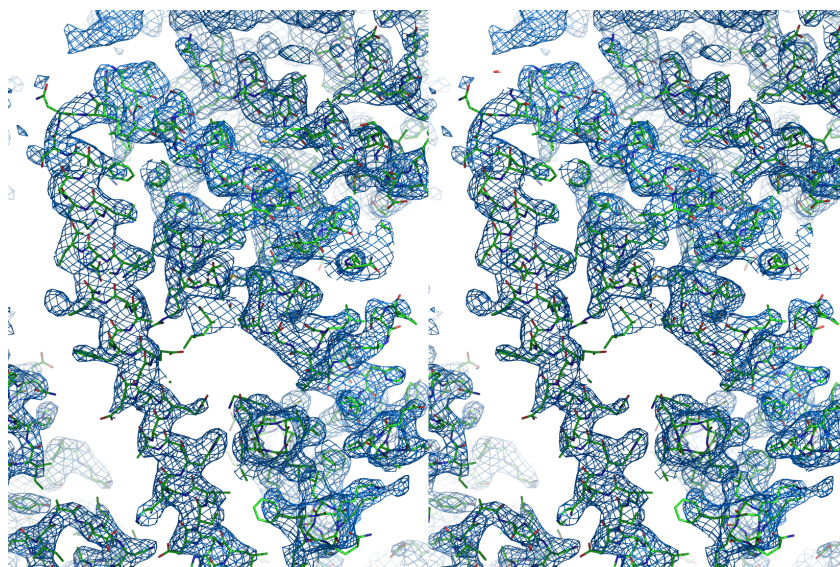

**Supplementary Figure 6. Stereo image of a portion of the electron density map.**  
Section of final  $2|F_o| - |F_c|$  map contoured at  $1\sigma$ .
